# Supplementary material for: Molecular dynamics simulation‐guided toehold mediated strand displacement probe for single‐nucleotide variants detection
Source: PubMed Central journal article supplement (PMC10190925; doi:10.1002/exp.20210265), 2022-01-24
Supplement: EXP2-2-20210265-s001.pdf [file EXP2-2-20210265-s001.pdf]

**Supporting Information**  
**Molecular Dynamics Simulation-Guided Toehold Mediated**  
**Strand Displacement Probe for Single-Nucleotide Variants**  
**Detection**

*Linghao Zhang,<sup>a</sup> Jing Chen,<sup>a</sup> Mengya He,<sup>a</sup> and Xin Su,<sup>a,\*</sup>*

<sup>a</sup> College of Life Science and Technology, Beijing University of Chemical Technology,  
Beijing 100029, China.

\* Corresponding author

Email: xinsu@mail.buct.edu.cn

Tel: +86-10-64421335

## Content

|                                                                                                |    |
|------------------------------------------------------------------------------------------------|----|
| <b>Supporting Tables</b> .....                                                                 | 1  |
| <b>Table S1.</b> Sequence of the oligonucleotides in this work. ....                           | 1  |
| <b>Table S2.</b> $\Delta G$ by NUPACK analysis. ....                                           | 5  |
| <b>Table S3.</b> Biasing weight $W$ using in simulation of PM-TMSD system. ....                | 6  |
| <b>Table S4.</b> Biasing weight $W$ using in simulation of MM-TMSD (Toe4) system. ....         | 7  |
| <b>Table S5.</b> Biasing weight $W$ using in simulation of MM-TMSD (Toe7) system. ....         | 7  |
| <b>Table S6.</b> Biasing weight $W$ using in simulation of MM-TMSD (BM1) system. ....          | 8  |
| <b>Table S7.</b> Biasing weight $W$ using in simulation of MM-TMSD (BM11) system.<br>.....     | 8  |
| <b>Table S8.</b> Simulation data obtained from FFS simulations of PM-TMSD and<br>MM-TMSD. .... | 9  |
| <b>Supporting Figures</b> .....                                                                | 10 |

## Supporting Tables

**Table S1.** Sequence of the oligonucleotides in this work.

| Name                                             | Sequence (5'-3')                                   |
|--------------------------------------------------|----------------------------------------------------|
| Universal fluorescent strand and quencher strand |                                                    |
| FAM-20                                           | FAM-ACACCTTTAACCCGTACCAT                           |
| HEX-20                                           | HEX-ACACCTTTAACCCGTACCAT                           |
| ROX-20                                           | ROX-ACACCTTTAACCCGTACCAT                           |
| CY5-20                                           | CY5-ACACCTTTAACCCGTACCAT                           |
| Q1-22                                            | AAGGAGCACAGGTTACCATAAG-BHQ1                        |
| Q3-22                                            | AAGGAGCACAGGTTACCATAAG-BHQ3                        |
| Strands for testing the nine genes               |                                                    |
| EGFR-L858R(SNV4)                                 | ATGTCAAGATCACAGATTTTGGGCGGGC                       |
| EGFR-L858R(WT4)                                  | ATGTCAAGATCACAGATTTTGGGCTGGC                       |
| F_L858R(4)                                       | ATGGTACGGGTAAAGGTGTATGTCAAGATCACAGATTTTG           |
| Q_L858R(4)                                       | GCCCGCCAAAATCTGTGATCTTGACATCTTATGGTAACCTGTGCTCCTT  |
| EGFR-L858R(SNV7)                                 | TCAAGATCACAGATTTTGGGCGGGCCAA                       |
| EGFR-L858R(WT7)                                  | TCAAGATCACAGATTTTGGGCTGGCCAA                       |
| F_L858R(7)                                       | ATGGTACGGGTAAAGGTGTTCAAGATCACAGATTTTGGGC           |
| Q_L858R(7)                                       | TTGGCCCGCCAAAATCTGTGATCTTGACTTATGGTAACCTGTGCTCCTT  |
| EGFR-L858R(SNV1)                                 | CAAGATCACAGATTTTGGGCGGGCCAAA                       |
| EGFR-L858R(WT1)                                  | CAAGATCACAGATTTTGGGCTGGCCAAA                       |
| F_L858R(1)                                       | ATGGTACGGGTAAAGGTGTCAAGATCACAGATTTTGGGCG           |
| Q_L858R(1)                                       | TTTGGCCCGCCAAAATCTGTGATCTTGCTTATGGTAACCTGTGCTCCTT  |
| EGFR-L858R(SNV11)                                | GATTTTGGGCGGGCCAAACTGCTGGGTG                       |
| EGFR-L858R(WT11)                                 | GATTTTGGGCTGGCCAAACTGCTGGGTG                       |
| F_L858R(11)                                      | ATGGTACGGGTAAAGGTGTGATTTTGGGCGGGCCAAACTG           |
| Q_L858R(11)                                      | CACCCAGCAGTTTGGCCCGCCAAAATCCTTATGGTAACCTGTGCTCCTT  |
| NRAS-G12C(SNV4)                                  | TACAAACTGGTGGTGGTTGGAGCATGTG                       |
| NRAS-G12C(WT4)                                   | TACAAACTGGTGGTGGTTGGAGCAGGTG                       |
| F_G12C(4)                                        | ATGGTACGGGTAAAGGTGTTACAAACTGGTGGTGGTTGGA           |
| Q_G12C(4)                                        | CACATGCTCCAACCACCACCAGTTTGTACTTATGGTAACCTGTGCTCCTT |
| NRAS-G12C(SNV7)                                  | AAACTGGTGGTGGTTGGAGCATGTGGTG                       |
| NRAS-G12C(WT7)                                   | AAACTGGTGGTGGTTGGAGCAGGTGGTG                       |
| F_G12C(7)                                        | ATGGTACGGGTAAAGGTGTAAACTGGTGGTGGTTGGAGCA           |
| Q_G12C(7)                                        | CACCACATGCTCCAACCACCACCAGTTTCTTATGGTAACCTGTGCTCCTT |
| NRAS-G12C(SNV1)                                  | AACTGGTGGTGGTTGGAGCATGTGGTGT                       |
| NRAS-G12C(WT1)                                   | AACTGGTGGTGGTTGGAGCAGGTGGTGT                       |
| F_G12C(1)                                        | ATGGTACGGGTAAAGGTGTAACTGGTGGTGGTTGGAGCAT           |
| Q_G12C(1)                                        | ACACCACATGCTCCAACCACCACCAGTTCTTATGGTAACCTGTGCTCCTT |
| NRAS-G12C(SNV11)                                 | GGTTGGAGCATGTGGTGGTTGGGAAAAGC                      |
| NRAS-G12C(WT11)                                  | GGTTGGAGCAGGTGGTGGTTGGGAAAAGC                      |
| F_G12C(11)                                       | ATGGTACGGGTAAAGGTGTGGTTGGAGCATGTGGTGGTGG           |

|                      |                                                        |
|----------------------|--------------------------------------------------------|
| Q_G12C(11)           | GCTTTTCCCAACACCACATGCTCCAACCCTTATGGTAACCTGTGCTCCTT     |
| N501Y(SNV4)          | CAAAGCTACGGTTTCCAACCGACCTACG                           |
| N501Y(WT4)           | CAAAGCTACGGTTTCCAACCGACCAACG                           |
| F_N501Y(4)           | ATGGTACGGGTTAAAGGTGTCAAAGCTACGGTTTCCAACCG              |
| Q_N501Y(4)           | CGTAGGTCGGTTGGAAACCGTAGCTTTGCTTATGGTAACCTGTGCTCCTT     |
| N501Y(SNV7)          | AGCTACGGTTTCCAACCGACCTACGGTG                           |
| N501Y(WT7)           | AGCTACGGTTTCCAACCGACCAACGGTG                           |
| F_N501Y(7)           | ATGGTACGGGTTAAAGGTGTAGCTACGGTTTCCAACCGACC              |
| Q_N501Y(7)           | CACCGTAGGTCGGTTGGAAACCGTAGCTCTTATGGTAACCTGTGCTCCTT     |
| N501Y(SNV1)          | GCTACGGTTTCCAACCGACCTACGGTGT                           |
| N501Y(WT1)           | GCTACGGTTTCCAACCGACCAACGGTGT                           |
| F_N501Y(1)           | ATGGTACGGGTTAAAGGTGTGCTACGGTTTCCAACCGACCT              |
| Q_N501Y(1)           | ACACCGTAGGTCGGTTGGAAACCGTAGCCTTATGGTAACCTGTGCTCCTT     |
| N501Y(SNV11)         | CCAACCGACCTACGGTGTGGTTACCAG                            |
| N501Y(WT11)          | CCAACCGACCAACGGTGTGGTTACCAG                            |
| F_N501Y(11)          | ATGGTACGGGTTAAAGGTGTCCAACCGACCTACGGTGTGG               |
| Q_N501Y(11)          | CTGGTAACCAACACCGTAGGTCGGTTGGCTTATGGTAACCTGTGCTCCTT     |
| D614G(SNV4)          | ACCAGGTTGCGGTGCTGTATCAAGGCGT                           |
| D614G(WT4)           | ACCAGGTTGCGGTGCTGTATCAAGACGT                           |
| F_D614G(4)           | ATGGTACGGGTTAAAGGTGTACCAGTTGCGGTGCTGTATC               |
| Q_D614G(4)           | ACGCCTTGATACAGCACCGCAACCTGGTCTTATGGTAACCTGTGCTCCTT     |
| D614G(SNV7)          | AGGTTGCGGTGCTGTATCAAGGCGTTAA                           |
| D614G(WT7)           | AGGTTGCGGTGCTGTATCAAGACGTTAA                           |
| F_D614G(7)           | ATGGTACGGGTTAAAGGTGTAGGTTGCGGTGCTGTATCAAG              |
| Q_D614G(7)           | TTAACGCCTTGATACAGCACCGCAACCTCTTATGGTAACCTGTGCTCCTT     |
| D614G(SNV1)          | GGTTGCGGTGCTGTATCAAGGCGTTAAC                           |
| D614G(WT1)           | GGTTGCGGTGCTGTATCAAGACGTTAAC                           |
| F_D614G(1)           | ATGGTACGGGTTAAAGGTGTGGTTGCGGTGCTGTATCAAGG              |
| Q_D614G(1)           | GTTAACGCCTTGATACAGCACCGCAACCTTATGGTAACCTGTGCTCCTT      |
| D614G(SNV11)         | CTGTATCAAGGCGTTAACTGCACCGAAG                           |
| D614G(WT11)          | CTGTATCAAGACGTTAACTGCACCGAAG                           |
| F_D614G(11)          | ATGGTACGGGTTAAAGGTGTCTGTATCAAGGCGTTAACTGC              |
| Q_D614G(11)          | CTTCGGTGCAGTTAACGCCTTGATACAGCTTATGGTAACCTGTGCTCCTT     |
| PIKC3CA-H1047R(SNV4) | TCATGAAACAAATGAATGATGCACGTCA                           |
| PIKC3CA-H1047R(WT4)  | TCATGAAACAAATGAATGATGCACATCA                           |
| F_H1047R(4)          | ATGGTACGGGTTAAAGGTGTTTCATGAAACAAATGAATGATG             |
| Q_H1047R(4)          | TGACGTGCATCATTCAATTTGTTTCATGACTTATGGTAACCTGTGCTCCTT    |
| PIKC3CA-H1047R(SNV7) | TGAAACAAATGAATGATGCACGTCATGG                           |
| PIKC3CA-H1047R(WT7)  | TGAAACAAATGAATGATGCACATCATGG                           |
| F_H1047R(7)          | ATGGTACGGGTTAAAGGTGTTGAAACAAATGAATGATGCAC              |
| Q_H1047R(7)          | CCATGACGTGCATCATTCAATTTGTTTCATGACTTATGGTAACCTGTGCTCCTT |
| PIKC3CA-H1047R(SNV1) | GAAACAAATGAATGATGCACGTCATGGT                           |
| PIKC3CA-H1047R(WT1)  | GAAACAAATGAATGATGCACATCATGGT                           |
| F_H1047R(1)          | ATGGTACGGGTTAAAGGTGTGAAACAAATGAATGATGCACG              |

|                       |                                                     |
|-----------------------|-----------------------------------------------------|
| Q_H1047R(1)           | ACCATGACGTGCATCATTCAATTTGTTTCCTTATGGTAACCTGTGCTCCTT |
| PIKC3CA-H1047R(SNV11) | AATGATGCACATCATGGTGGCTGGACAA                        |
| PIKC3CA-H1047R(WT11)  | AATGATGCACGTGCATGGTGGCTGGACAA                       |
| F_H1047R(11)          | ATGGTACGGGTTAAAGGTGTAATGATGCACATCATGGTGGC           |
| Q_H1047R(11)          | TTGTCCAGCCACCATGATGTGCATCATTCTTATGGTAACCTGTGCTCCTT  |
| KRAS-G12R(SNV4)       | TATAAACTTGTGGTAGTTGGAGCTCGTG                        |
| KRAS-G12R(WT4)        | TATAAACTTGTGGTAGTTGGAGCTGGTG                        |
| F_G12R(4)             | ATGGTACGGGTTAAAGGTGTTATAAACTTGTGGTAGTTGGA           |
| Q_G12R(4)             | CACGAGCTCCAACCTACCACAAGTTTATACTTATGGTAACCTGTGCTCCTT |
| KRAS-G12R(SNV7)       | AAACTTGTGGTAGTTGGAGCTCGTGGCG                        |
| KRAS-G12R(WT7)        | AAACTTGTGGTAGTTGGAGCTGGTGGCG                        |
| F_G12R(7)             | ATGGTACGGGTTAAAGGTGTAAACTTGTGGTAGTTGGAGCT           |
| Q_G12R(7)             | CGCCACGAGCTCCAACCTACCACAAGTTTCTTATGGTAACCTGTGCTCCTT |
| KRAS-G12R(SNV1)       | AACTTGTGGTAGTTGGAGCTCGTGGCGT                        |
| KRAS-G12R(WT1)        | AACTTGTGGTAGTTGGAGCTGGTGGCGT                        |
| F_G12R(1)             | ATGGTACGGGTTAAAGGTGTAAACTTGTGGTAGTTGGAGCTC          |
| Q_G12R(1)             | ACGCCACGAGCTCCAACCTACCACAAGTTCTTATGGTAACCTGTGCTCCTT |
| KRAS-G12R(SNV11)      | AGTTGGAGCTCGTGGCGTAGGCAAGAGT                        |
| KRAS-G12R(WT11)       | AGTTGGAGCTGGTGGCGTAGGCAAGAGT                        |
| F_G12R(11)            | ATGGTACGGGTTAAAGGTGTAGTTGGAGCTCGTGGCGTAGG           |
| Q_G12R(11)            | ACTCTTGCCTACGCCACGAGCTCCAACCTTATGGTAACCTGTGCTCCTT   |
| STK11-F354L(SNV4)     | CGCGGACGAGGACGAGGACCTCTTGGAC                        |
| STK11-F354L(WT4)      | CGCGGACGAGGACGAGGACCTCTTCGAC                        |
| F_F354L(4)            | ATGGTACGGGTTAAAGGTGTGCGGACGAGGACGAGGACCT            |
| Q_F354L(4)            | GTCCAAGAGGTCCTCGTCCTCGTCCGCGCTTATGGTAACCTGTGCTCCTT  |
| STK11-F354L(SNV7)     | GGACGAGGACGAGGACCTCTTGGACATC                        |
| STK11-F354L(WT7)      | GGACGAGGACGAGGACCTCTTCGACATC                        |
| F_F354L(7)            | ATGGTACGGGTTAAAGGTGTGGACGAGGACGAGGACCTCTT           |
| Q_F354L(7)            | GATGTCCAAGAGGTCCTCGTCCTCGTCCCTTATGGTAACCTGTGCTCCTT  |
| STK11-F354L(SNV1)     | GACGAGGACGAGGACCTCTTGGACATCG                        |
| STK11-F354L(WT1)      | GACGAGGACGAGGACCTCTTCGACATCG                        |
| F_F354L(1)            | ATGGTACGGGTTAAAGGTGTGACGAGGACGAGGACCTCTTG           |
| Q_F354L(1)            | CGATGTCCAAGAGGTCCTCGTCCTCGTCCCTTATGGTAACCTGTGCTCCTT |
| STK11-F354L(SNV11)    | AGGACCTCTTGGACATCGAGGATGACAT                        |
| STK11-F354L(WT11)     | AGGACCTCTTCGACATCGAGGATGACAT                        |
| F_F354L(11)           | ATGGTACGGGTTAAAGGTGTAGGACCTCTTGGACATCGAGG           |
| Q_F354L(11)           | ATGTCATCCTCGATGTCCAAGAGGTCCTCTTATGGTAACCTGTGCTCCTT  |
| TP53-Y220C(SNV4)      | TTCGACATAGTGTGGTGGTGGCCCTGTGA                       |
| TP53-Y220C(WT4)       | TTCGACATAGTGTGGTGGTGGCCCTATGA                       |
| F_Y220C(4)            | ATGGTACGGGTTAAAGGTGTTTCGACATAGTGTGGTGGTGC           |
| Q_Y220C(4)            | TCACAGGGCACCACCACACTATGTCGAACCTTATGGTAACCTGTGCTCCTT |
| TP53-Y220C(SNV7)      | GACATAGTGTGGTGGTGGCCCTGTGAGCC                       |
| TP53-Y220C(WT7)       | GACATAGTGTGGTGGTGGCCCTATGAGCC                       |
| F_Y220C(7)            | ATGGTACGGGTTAAAGGTGTGACATAGTGTGGTGGTGGCCCT          |

|                   |                                                    |
|-------------------|----------------------------------------------------|
| Q_Y220C(7)        | GGCTCACAGGGCACCACCACACTATGTCCTTATGGTAACCTGTGCTCCTT |
| TP53-Y220C(SNV1)  | ACATAGTGTGGTGGTGGCCCTGTGAGCCG                      |
| TP53-Y220C(WT1)   | ACATAGTGTGGTGGTGGCCCTATGAGCCG                      |
| F_Y220C(1)        | ATGGTACGGGTAAAGGTGTACATAGTGTGGTGGTGGCCCTG          |
| Q_Y220C(1)        | CGGCTCACAGGGCACCACCACACTATGTCTTATGGTAACCTGTGCTCCTT |
| TP53-Y220C(SNV11) | GTGGTGGCCCTGTGAGCCGCTGAGGTCT                       |
| TP53-Y220C(WT11)  | GTGGTGGCCCTATGAGCCGCTGAGGTCT                       |
| F_Y220C(11)       | ATGGTACGGGTAAAGGTGTGTGGTGGCCCTGTGAGCCGCCT          |
| Q_Y220C(11)       | AGACCTCAGGCGGCTCACAGGGCACCACCTTATGGTAACCTGTGCTCCTT |
| EGFR-T790M(SNV4)  | TCACCTCCACCGTGCAGCTCATCATGCA                       |
| EGFR-T790M(WT4)   | TCACCTCCACCGTGCAGCTCATCACGCA                       |
| F_T790M(4)        | ATGGTACGGGTAAAGGTGTTCACCTCCACCGTGCAGCTCA           |
| Q_T790M(4)        | TGCATGATGAGCTGCACGGTGGAGGTGACTTATGGTAACCTGTGCTCCTT |
| EGFR-T790M(SNV7)  | CCTCCACCGTGCAGCTCATCATGCAGCT                       |
| EGFR-T790M(WT7)   | CCTCCACCGTGCAGCTCATCACGCAGCT                       |
| F_T790M(7)        | ATGGTACGGGTAAAGGTGTCCTCCACCGTGCAGCTCATCA           |
| Q_T790M(7)        | AGCTGCATGATGAGCTGCACGGTGGAGGCTTATGGTAACCTGTGCTCCTT |
| EGFR-T790M(SNV1)  | CTCCACCGTGCAGCTCATCATGCAGCTC                       |
| EGFR-T790M(WT1)   | CTCCACCGTGCAGCTCATCACGCAGCTC                       |
| F_T790M(1)        | ATGGTACGGGTAAAGGTGTCTCCACCGTGCAGCTCATCAT           |
| Q_T790M(1)        | GAGCTGCATGATGAGCTGCACGGTGGAGCTTATGGTAACCTGTGCTCCTT |
| EGFR-T790M(SNV11) | CAGCTCATCATGCAGCTCATGCCCTTCG                       |
| EGFR-T790M(WT11)  | CAGCTCATCACGCAGCTCATGCCCTTCG                       |
| F_T790M(11)       | ATGGTACGGGTAAAGGTGTCAGCTCATCATGCAGCTCATG           |
| Q_T790M(11)       | CGAAGGGCATGAGCTGCATGATGAGCTGCTTATGGTAACCTGTGCTCCTT |

---

Strands for probe-sink systems

---

|          |                              |
|----------|------------------------------|
| D614G-S1 | AGGTTGCGGTGCTGTATCAAG        |
| D614G-S2 | TTAACGTCTTGATACAGCACCGCAACCT |
| L858R-S1 | TCAAGATCACAGATTTTGGGC        |
| L858R-S2 | TTGGCCAGCCAAAATCTGTGATCTTGA  |
| T790M-S1 | CCTCCACCGTGCAGCTCATCA        |
| T790M-S2 | AGCTGCGTGATGAGCTGCACGGTGGAGG |

---

PCR Primers

---

|                |                        |
|----------------|------------------------|
| D614G-F.P      | GGGCACCAACACCAGCAACC   |
| D614G-R.P      | P-CCACCGGAACTTCGGTGCAG |
| N501Y-F.P      | ACTGCTATTTCCCGCTGCAA   |
| N501Y-R.P      | P-ACGGTACGGCTGGTAACCAA |
| EGFR-L858R-F.P | GGTGAAAACACCGCAGCATG   |
| EGFR-L858R-R.P | P-TCTCTTCCGCACCCAGCAGT |

---

Note: F\_L858R(4), Q\_L858R(4), FAM-20, and Q1-22 forms TWJ probe to detect EGFR-L858R(SNV4) and EGFR-L858R(WT4). In brackets, (4), (7), (1), and (11) are corresponding to Toe4, Toe7, BM1, and BM11. In universal strands, FAM-20, HEX-20, ROX-20, and CY5-20 are the same sequence fluorescent strands with different fluorophore for multiple detection. BHQ1 quenches FAM, HEX and ROX, BHQ3 quenches CY5.

**Table S2.**  $\Delta G$  by NUPACK analysis.

|    | $\Delta G$ (kcal/mol) |       |        |        |
|----|-----------------------|-------|--------|--------|
|    | Toe4                  | Toe7  | BM1    | BM11   |
| PM | -14.33                | -15.4 | -14.58 | -18    |
| MM | -8.59                 | -8.86 | -8.17  | -11.77 |

$\Delta G$  of PM-TMSD and MM-TMSDs were predicted by NUPACK.  $\Delta\Delta G$  is the difference between  $\Delta G_{PM}$  and  $\Delta G_{MM}$ .

Conditions and settings in NUPACK:

salinity ( $\text{Na}^+$ : 0.05M;  $\text{Mg}^{2+}$ : 0.005M);

temperature (25°C);

concentration (200 nM);

dangle treatment (Some).

## US simulation

**Table S3.** Biasing weight  $W$  using in simulation of PM-TMSD system.

| $N_B \backslash N_A$ | 0   | 1    | 2    | 3   | 4   | 5  | 6 | 7 | 8    | 9   | ... | 17 | 18 | 19 | ... | 25   | 26   | 27  | 28   |      |      |
|----------------------|-----|------|------|-----|-----|----|---|---|------|-----|-----|----|----|----|-----|------|------|-----|------|------|------|
| 0                    | 0.1 | 1    | 1    | 1   | 1   | 1  | 1 | 1 | 1    | 1   |     | 1  | 1  | 1  |     | 1    | 1    | 1   | 1    |      |      |
| 1                    | 0.1 |      |      |     |     |    |   |   |      |     |     |    |    |    |     | 2000 | 2000 | 200 |      |      |      |
| 2                    | 0.1 |      |      |     |     |    |   |   |      |     |     |    |    |    |     | 2000 | 200  |     |      |      |      |
| 3                    | 0.1 |      |      |     |     |    |   |   |      |     |     |    |    |    |     | 200  |      |     |      |      |      |
| 4                    | 0.1 |      |      |     |     |    |   |   |      |     |     |    |    |    |     |      |      |     |      |      |      |
| 5                    | 0.1 |      |      |     |     |    |   |   |      |     |     |    |    |    |     |      |      |     |      |      |      |
| 6                    | 0.1 |      |      |     |     |    |   |   |      |     |     |    |    |    |     |      |      |     |      |      |      |
| 7                    | 0.1 |      |      |     |     |    |   |   |      |     |     |    |    |    |     |      |      |     | 2000 |      |      |
| 8                    | 0.1 |      |      |     |     |    |   |   |      |     |     |    |    |    |     |      |      |     | 2000 | 2000 |      |
| 9                    | 0.1 |      |      |     |     |    |   |   |      |     |     |    |    |    |     |      |      |     | 2000 | 2000 | 200  |
| 10                   | 0.1 |      |      |     |     |    |   |   |      |     |     |    |    |    |     |      |      |     | 2000 | 200  |      |
| 11                   | 0.1 |      |      |     |     |    |   |   |      |     |     |    |    |    |     |      |      |     | 200  |      |      |
| ...                  |     |      |      |     |     |    |   |   |      |     |     |    |    |    |     |      |      |     |      |      |      |
| 17                   | 0.1 |      |      |     |     |    |   |   |      |     |     |    |    |    |     |      |      |     |      | 2000 |      |
| 18                   | 0.1 |      |      |     |     |    |   |   |      |     |     |    |    |    |     |      |      |     |      | 2000 | 2000 |
| 19                   | 0.1 | 3000 | 1200 | 400 | 200 | 20 | 5 | 2 | 2000 | 200 |     |    |    |    |     |      |      |     |      |      |      |
| 20                   | 0.1 | 3000 | 1200 | 400 | 200 | 20 | 5 | 2 | 200  |     |     |    |    |    |     |      |      |     |      |      |      |
| 21                   | 0.1 | 3000 | 1200 | 400 | 200 | 20 | 5 | 2 |      |     |     |    |    |    |     |      |      |     |      |      |      |

$N_A$  is the number of base pairs between invader strand and template strand, and  $N_B$  is the number of base pairs between incumbent strand and template strand. The design of  $W$  depends on whether a mismatch is present.  $W_{MM}=10 \times W_{PM}$ .



**Table S4.** Biasing weight  $W$  using in simulation of MM-TMSD (Toe4) system.

| $N_A \backslash N_B$ | 0   | 1    | 2    | 3 | 4   | 5   | 6  | 7 | 8    | ... | 17 | 18 | 19 | ... | 25   | 26   | 27   |
|----------------------|-----|------|------|---|-----|-----|----|---|------|-----|----|----|----|-----|------|------|------|
| 0                    | 0.1 | 1    | 1    |   | 1   | 1   | 1  | 1 | 1    |     | 1  | 1  | 1  |     | 1    | 1    | 1    |
| 1                    | 0.1 |      |      |   |     |     |    |   |      |     |    |    |    |     | 2000 | 200  |      |
| 2                    | 0.1 |      |      |   |     |     |    |   |      |     |    |    |    |     | 200  |      |      |
| 3                    | 0.1 |      |      |   |     |     |    |   |      |     |    |    |    |     |      |      |      |
| 4                    | 0.1 |      |      |   |     |     |    |   |      |     |    |    |    |     |      |      |      |
| 5                    | 0.1 |      |      |   |     |     |    |   |      |     |    |    |    |     |      |      |      |
| 6                    | 0.1 |      |      |   |     |     |    |   |      |     |    |    |    |     | 2000 |      |      |
| 7                    | 0.1 |      |      |   |     |     |    |   |      |     |    |    |    |     | 2000 | 2000 |      |
| 8                    | 0.1 |      |      |   |     |     |    |   |      |     |    |    |    |     | 2000 | 2000 | 200  |
| 9                    | 0.1 |      |      |   |     |     |    |   |      |     |    |    |    |     | 2000 | 200  |      |
| 10                   | 0.1 |      |      |   |     |     |    |   |      |     |    |    |    |     | 200  |      |      |
| ...                  |     |      |      |   |     |     |    |   |      |     |    |    |    |     |      |      |      |
| 17                   | 0.1 |      |      |   |     |     |    |   |      |     |    |    |    |     |      |      | 2000 |
| 18                   | 0.1 |      |      |   |     |     |    |   |      |     |    |    |    |     |      |      | 2000 |
| 19                   | 0.1 | 3000 | 1200 |   | 400 | 500 | 20 | 5 | 2000 | 200 |    |    |    |     |      |      |      |
| 20                   | 0.1 | 3000 | 1200 |   | 400 | 500 | 20 | 5 | 200  |     |    |    |    |     |      |      |      |
| 21                   | 0.1 | 3000 | 1200 |   | 400 | 500 | 20 | 5 |      |     |    |    |    |     |      |      |      |

**Table S5.** Biasing weight  $W$  using in simulation of MM-TMSD (Toe7) system.

| $N_A \backslash N_B$ | 0   | 1    | 2    | 3   | 4   | 5  | 6 | 7     | 8    | ... | 17 | 18 | 19 | ... | 25    | 26   | 27    |
|----------------------|-----|------|------|-----|-----|----|---|-------|------|-----|----|----|----|-----|-------|------|-------|
| 0                    | 0.1 | 1    | 1    | 1   | 1   | 1  | 1 | 1     | 1    |     | 1  | 1  | 1  |     | 1     | 1    | 1     |
| 1                    | 0.1 |      |      |     |     |    |   |       |      |     |    |    |    |     | 20000 | 2000 |       |
| 2                    | 0.1 |      |      |     |     |    |   |       |      |     |    |    |    |     | 2000  |      |       |
| 3                    | 0.1 |      |      |     |     |    |   |       |      |     |    |    |    |     |       |      |       |
| 4                    | 0.1 |      |      |     |     |    |   |       |      |     |    |    |    |     |       |      |       |
| 5                    | 0.1 |      |      |     |     |    |   |       |      |     |    |    |    |     |       |      |       |
| 6                    | 0.1 |      |      |     |     |    |   |       |      |     |    |    |    |     |       |      | 20000 |
| 7                    | 0.1 |      |      |     |     |    |   |       |      |     |    |    |    |     |       |      | 20000 |
| 8                    | 0.1 |      |      |     |     |    |   |       |      |     |    |    |    |     |       |      | 20000 |
| 9                    | 0.1 |      |      |     |     |    |   |       |      |     |    |    |    |     |       |      | 20000 |
| 10                   | 0.1 |      |      |     |     |    |   |       |      |     |    |    |    |     |       |      | 2000  |
| ...                  |     |      |      |     |     |    |   |       |      |     |    |    |    |     |       |      |       |
| 17                   | 0.1 |      |      |     |     |    |   |       |      |     |    |    |    |     |       |      | 20000 |
| 18                   | 0.1 |      |      |     |     |    |   |       |      |     |    |    |    |     |       |      | 20000 |
| 19                   | 0.1 | 3000 | 1200 | 400 | 500 | 20 | 5 | 20000 | 2000 |     |    |    |    |     |       |      |       |
| 20                   | 0.1 | 3000 | 1200 | 400 | 500 | 20 | 5 | 2000  |      |     |    |    |    |     |       |      |       |
| 21                   | 0.1 | 3000 | 1200 | 400 | 500 | 20 | 5 |       |      |     |    |    |    |     |       |      |       |

**Table S6.** Biasing weight  $W$  using in simulation of MM-TMSD (BM1) system.

| $N_B \backslash N_A$ | 0   | 1    | 2    | 3   | 4   | 5  | 6 | 7 | 8     | 9     | ... | 17    | 18    | 19    | ... | 25    | 26   | 27 |
|----------------------|-----|------|------|-----|-----|----|---|---|-------|-------|-----|-------|-------|-------|-----|-------|------|----|
| 0                    | 0.1 | 1    | 1    | 1   | 1   | 1  | 1 | 1 | 1     | 1     |     | 1     | 1     | 1     |     | 1     | 1    | 1  |
| 1                    | 0.1 |      |      |     |     |    |   |   |       |       |     |       |       |       |     | 20000 | 2000 |    |
| 2                    | 0.1 |      |      |     |     |    |   |   |       |       |     |       |       |       |     | 2000  |      |    |
| 3                    | 0.1 |      |      |     |     |    |   |   |       |       |     |       |       |       |     |       |      |    |
| 4                    | 0.1 |      |      |     |     |    |   |   |       |       |     |       |       |       |     |       |      |    |
| 5                    | 0.1 |      |      |     |     |    |   |   |       |       |     |       |       |       |     |       |      |    |
| 6                    | 0.1 |      |      |     |     |    |   |   |       |       |     |       |       | 20000 |     |       |      |    |
| 7                    | 0.1 |      |      |     |     |    |   |   |       |       |     |       | 20000 | 20000 |     |       |      |    |
| 8                    | 0.1 |      |      |     |     |    |   |   |       |       |     | 20000 | 20000 | 2000  |     |       |      |    |
| 9                    | 0.1 |      |      |     |     |    |   |   |       |       |     | 20000 | 2000  |       |     |       |      |    |
| 10                   | 0.1 |      |      |     |     |    |   |   |       |       |     | 2000  |       |       |     |       |      |    |
| ...                  |     |      |      |     |     |    |   |   |       |       |     |       |       |       |     |       |      |    |
| 16                   |     |      |      |     |     |    |   |   |       |       |     | 20000 |       |       |     |       |      |    |
| 17                   | 0.1 |      |      |     |     |    |   |   | 20000 | 20000 |     |       |       |       |     |       |      |    |
| 18                   | 0.1 |      |      |     |     |    |   |   | 20000 | 2000  |     |       |       |       |     |       |      |    |
| 19                   | 0.1 | 3000 | 1200 | 400 | 200 | 20 | 5 | 2 | 2000  |       |     |       |       |       |     |       |      |    |
| 20                   | 0.1 | 3000 | 1200 | 400 | 200 | 20 | 5 | 2 |       |       |     |       |       |       |     |       |      |    |
| 21                   | 0.1 | 3000 | 1200 | 400 | 200 | 20 | 5 | 2 |       |       |     |       |       |       |     |       |      |    |

**Table S7.** Biasing weight  $W$  using in simulation of MM-TMSD (BM11) system.

| $N_B \backslash N_A$ | 0   | 1    | 2    | 3   | 4   | 5  | 6 | 7 | 8    | 9    | ... | 17   | 18    | 19    | ... | 25    | 26   | 27 |
|----------------------|-----|------|------|-----|-----|----|---|---|------|------|-----|------|-------|-------|-----|-------|------|----|
| 0                    | 0.1 | 1    | 1    | 1   | 1   | 1  | 1 | 1 | 1    | 1    |     | 1    | 1     | 1     |     | 1     | 1    | 1  |
| 1                    | 0.1 |      |      |     |     |    |   |   |      |      |     |      |       |       |     | 20000 | 2000 |    |
| 2                    | 0.1 |      |      |     |     |    |   |   |      |      |     |      |       |       |     | 2000  |      |    |
| 3                    | 0.1 |      |      |     |     |    |   |   |      |      |     |      |       |       |     |       |      |    |
| 4                    | 0.1 |      |      |     |     |    |   |   |      |      |     |      |       |       |     |       |      |    |
| 5                    | 0.1 |      |      |     |     |    |   |   |      |      |     |      |       |       |     |       |      |    |
| 6                    | 0.1 |      |      |     |     |    |   |   |      |      |     |      |       | 20000 |     |       |      |    |
| 7                    | 0.1 |      |      |     |     |    |   |   |      |      |     |      | 20000 | 20000 |     |       |      |    |
| 8                    | 0.1 |      |      |     |     |    |   |   |      |      |     | 2000 | 20000 | 2000  |     |       |      |    |
| 9                    | 0.1 |      |      |     |     |    |   |   |      |      |     | 2000 | 2000  |       |     |       |      |    |
| 10                   | 0.1 |      |      |     |     |    |   |   |      |      |     | 200  |       |       |     |       |      |    |
| ...                  |     |      |      |     |     |    |   |   |      |      |     |      |       |       |     |       |      |    |
| 16                   |     |      |      |     |     |    |   |   |      |      |     | 2000 |       |       |     |       |      |    |
| 17                   | 0.1 |      |      |     |     |    |   |   | 2000 | 2000 |     |      |       |       |     |       |      |    |
| 18                   | 0.1 |      |      |     |     |    |   |   | 2000 | 200  |     |      |       |       |     |       |      |    |
| 19                   | 0.1 | 3000 | 1200 | 400 | 200 | 20 | 5 | 2 | 200  |      |     |      |       |       |     |       |      |    |
| 20                   | 0.1 | 3000 | 1200 | 400 | 200 | 20 | 5 | 2 |      |      |     |      |       |       |     |       |      |    |
| 21                   | 0.1 | 3000 | 1200 | 400 | 200 | 20 | 5 | 2 |      |      |     |      |       |       |     |       |      |    |

**Table S8.** Simulation data obtained from FFS simulations of PM-TMSD and MM-TMSD.

|        | PM               | Toe4 mismatch | Toe7 mismatch | BM1 mismatch | BM11 mismatch |
|--------|------------------|---------------|---------------|--------------|---------------|
| 1/flux | 17859.54         | 17606.5       | 17560.41      | 17980.8      | 17005.78      |
|        | success/attempts |               |               |              |               |
| Toe1   | 100/11051        | 100/61114     | 101/15704     | 101/30906    | 100/32862     |
| Toe2   | 106/346          | 103/306       | 103/233       | 102/341      | 102/709       |
| Toe3   | 106/158          | 106/157       | 105/155       | 106/146      | 105/142       |
| Toe4   | 101/227          |               | 105/179       | 103/160      | 101/192       |
| Toe5   | 101/336          | 101/456       | 101/213       | 104/203      | 105/179       |
| Toe6   | 102/341          | 102/284       | 101/370       | 101/232      | 102/164       |
| Toe7   | 100/406          | 100/515       |               | 102/273      | 102/649       |
| BM1    | 100/120          | 100/448       | 100/2476      |              | 104/135       |
| BM2    | 100/297          | 100/3542      | 100/3776      | 100/36724    | 100/1957      |
| BM3    | 100/2145         | 100/2980      | 101/4121      | 100/16950    | 101/4366      |
| BM4    | 100/172          | 100/524       | 102/294       | 100/7368     | 101/355       |
| BM5    | 100/1013         | 100/1083      | 100/4240      | 100/1508     | 100/2289      |
| BM6    | 100/1325         | 100/1249      | 100/1160      | 101/564      | 100/1400      |
| BM7    | 101/683          | 101/861       | 100/3679      | 100/9424     | 100/1834      |
| BM8    | 101/2793         | 100/3716      | 100/2901      | 100/3594     | 100/4697      |
| BM9    | 100/1109         | 101/1145      | 102/825       | 100/5389     | 100/1710      |
| BM10   | 101/2358         | 100/3338      | 101/3665      | 100/5159     | 100/2673      |
| BM11   | 101/1532         | 100/1856      | 100/1216      | 100/1886     |               |
| BM12   | 100/1304         | 100/1624      | 101/1967      | 100/3696     | 100/51128     |
| BM13   | 101/1033         | 100/1840      | 100/2326      | 100/1962     | 100/1132      |
| BM14   | 101/1366         | 100/1266      | 101/1285      | 100/3098     | 100/2292      |
| BM15   | 100/1766         | 101/2222      | 100/883       | 101/1631     | 102/340       |

“Attempts” represent the repeats of independent trial.

“Success” represents the statistics of success to completely displace one base.

Success probability is defined as the ratio of the success number to attempts number.

e.g. success probability (Toe1 in PM) =  $100 / 11051 = 0.009049$

## Supporting Figures

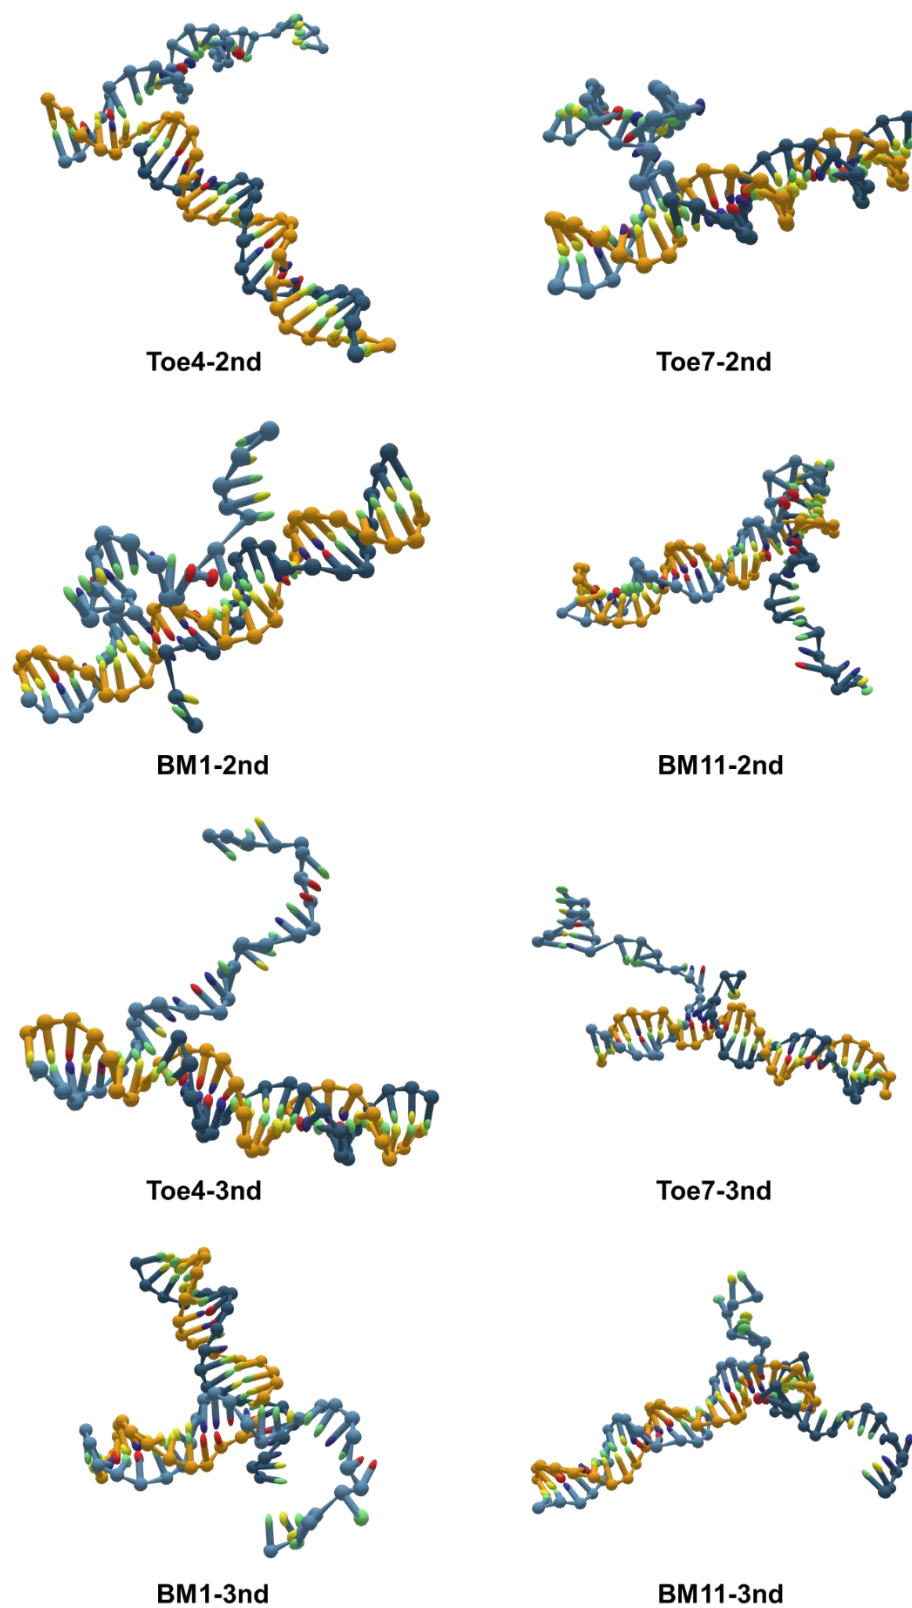

**Figure S1.** Conformations about base pairs formed after mismatch.

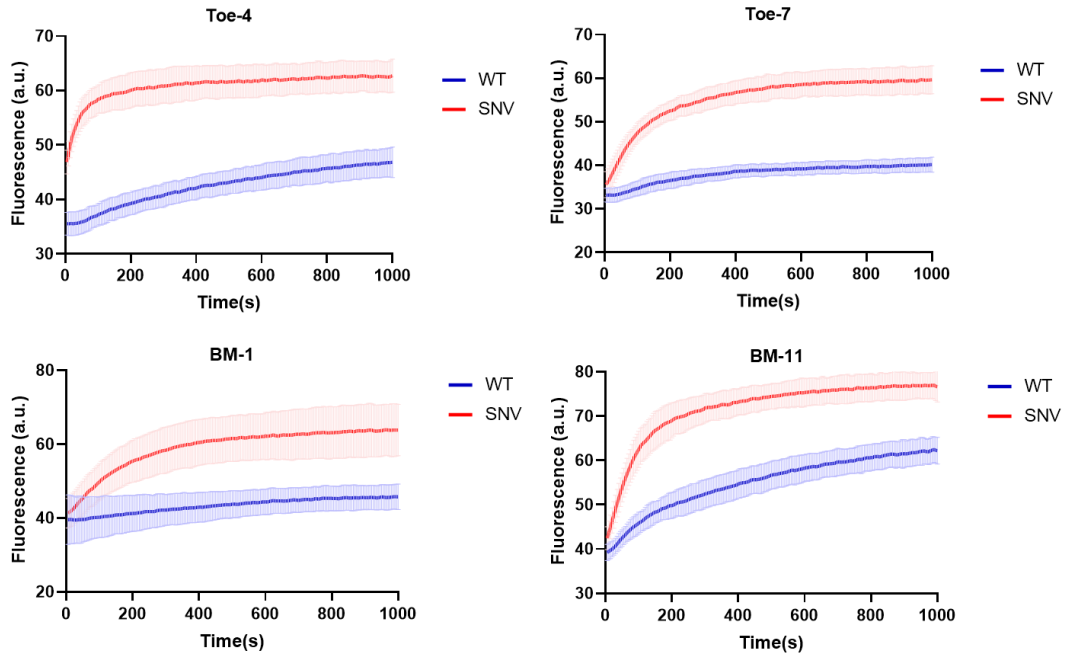

**Figure S2.** SNV detection of SARS-CoV-2-D614G by four kinds of probes.

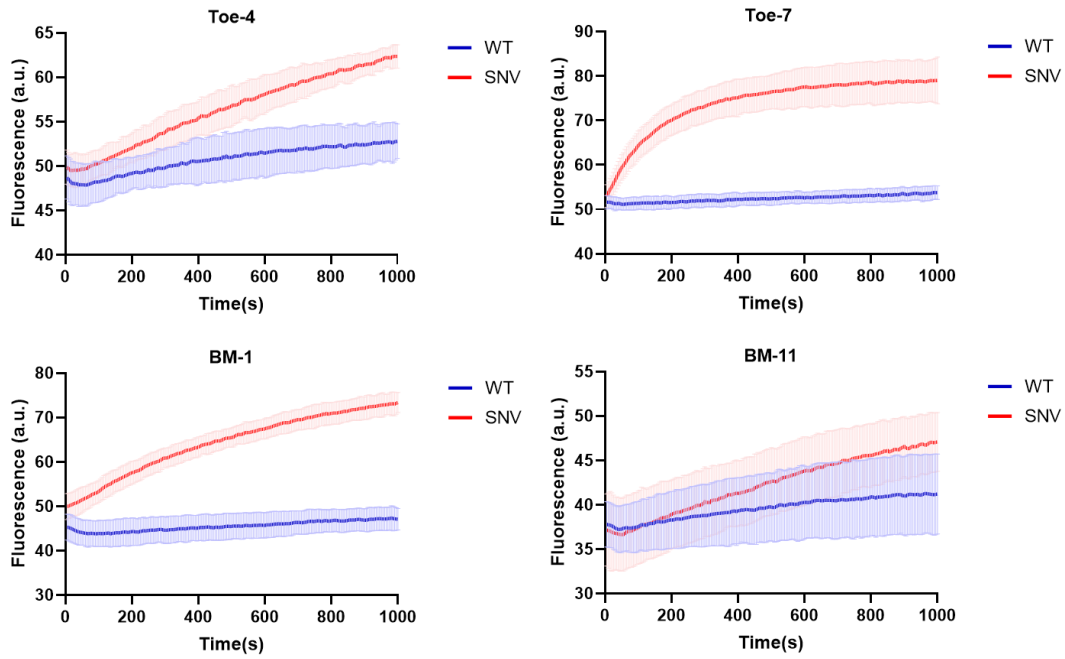

**Figure S3.** SNV detection of SARS-CoV-2-N501Y by four kinds of probes.

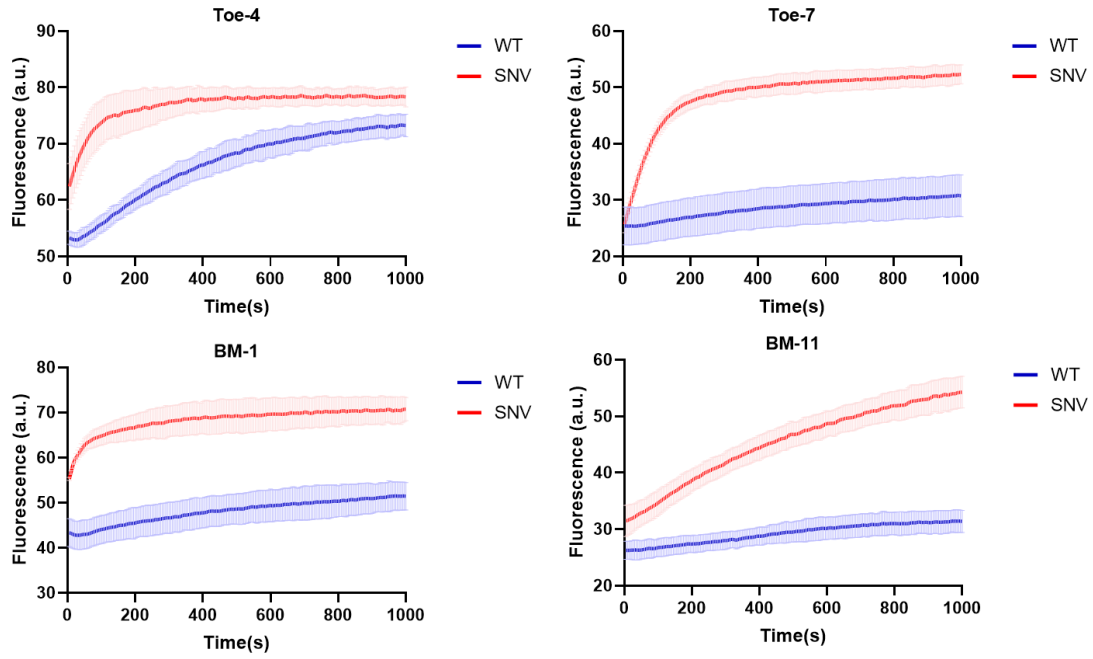

**Figure S4.** SNV detection of EGFR-L858R by four kinds of probes.

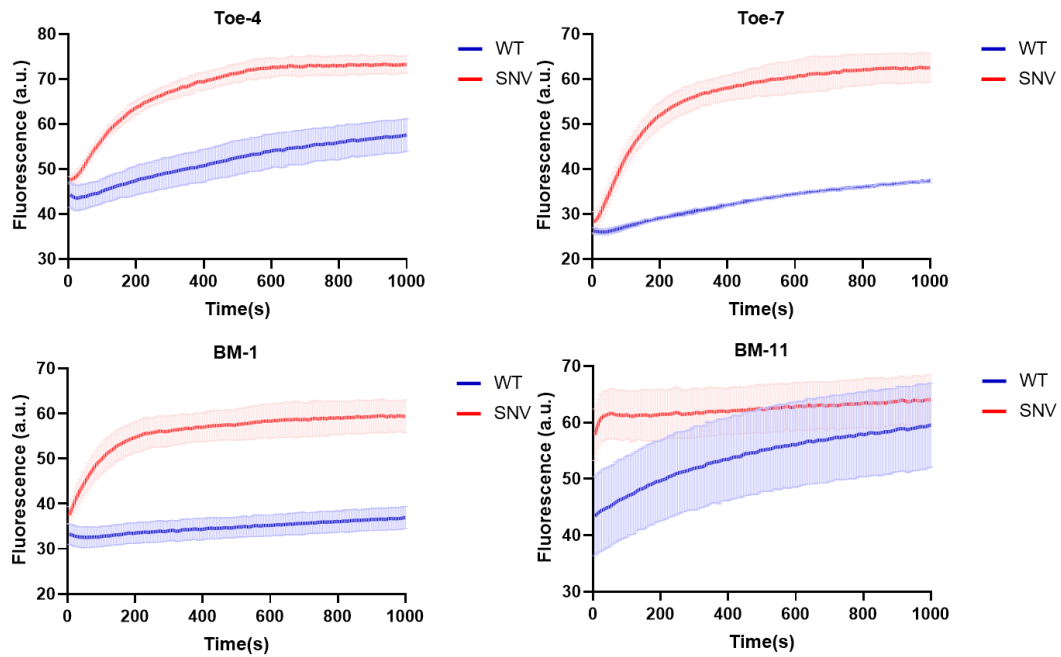

**Figure S5.** SNV detection of EGFR-T790M by four kinds of probes.

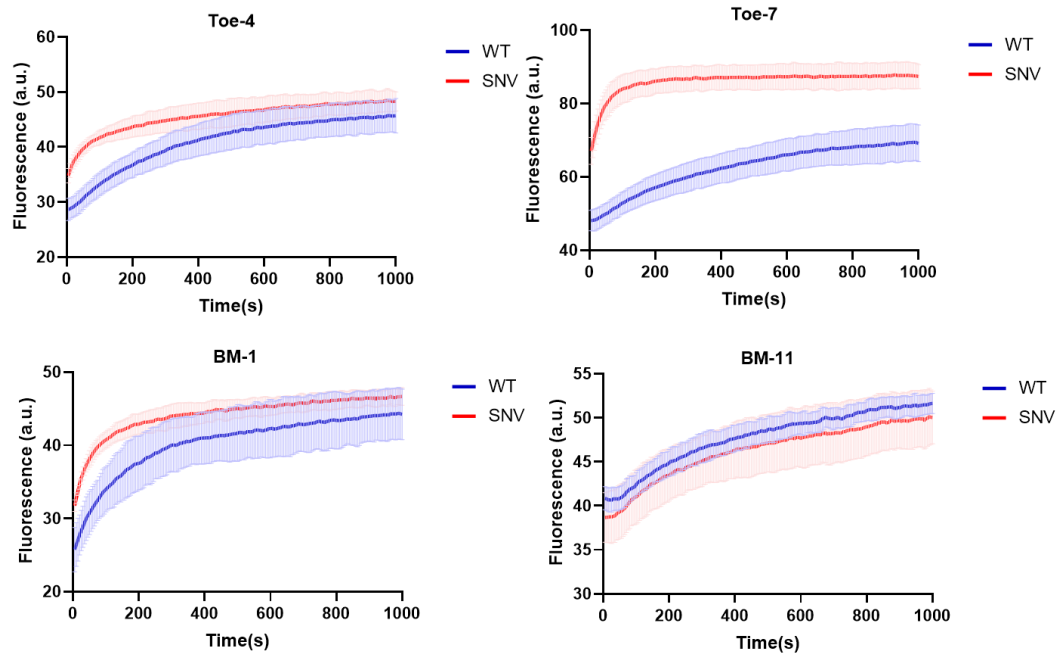

**Figure S6.** SNV detection of NRAS-G12C by four kinds of probes.

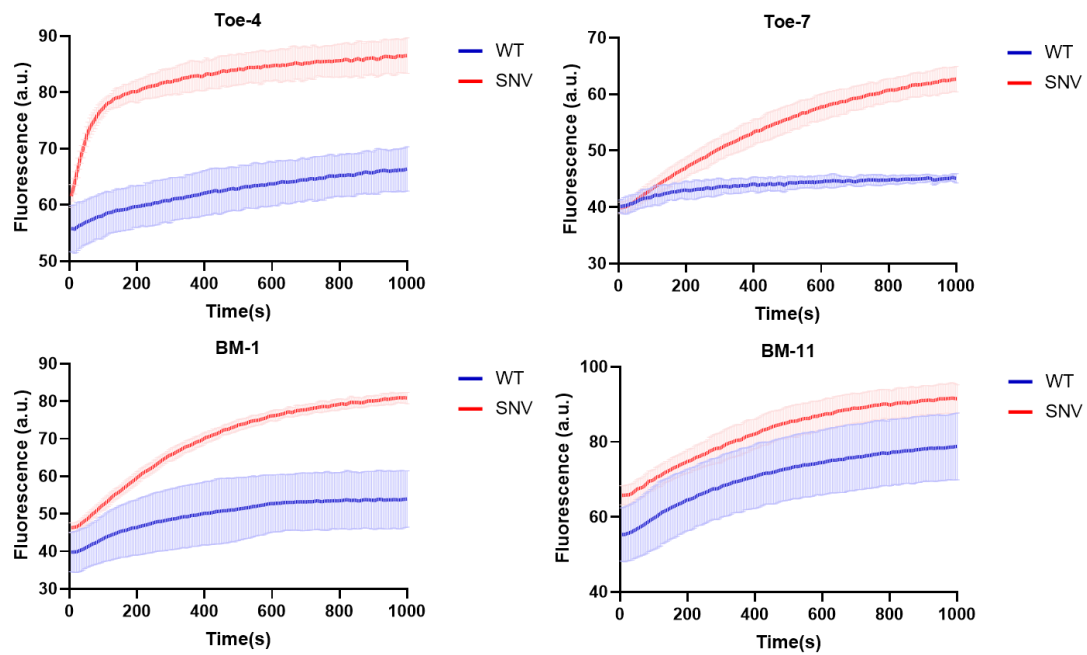

**Figure S7.** SNV detection of PIK3CA-H1047R by four kinds of probes.

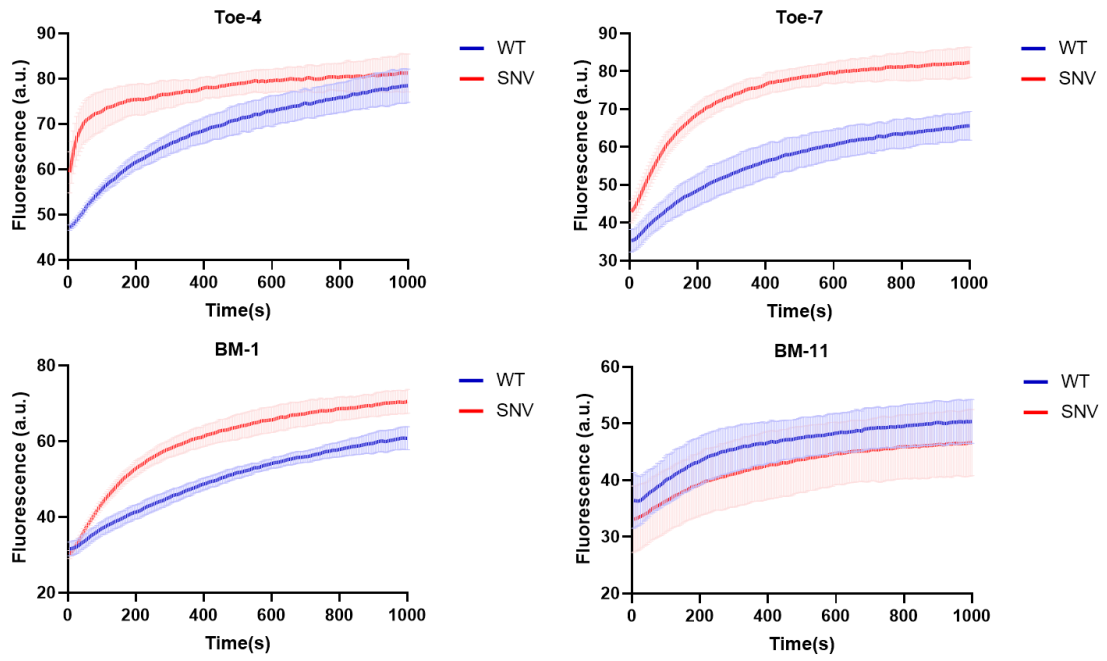

**Figure S8.** SNV detection of KRAS-G12R by four kinds of probes.

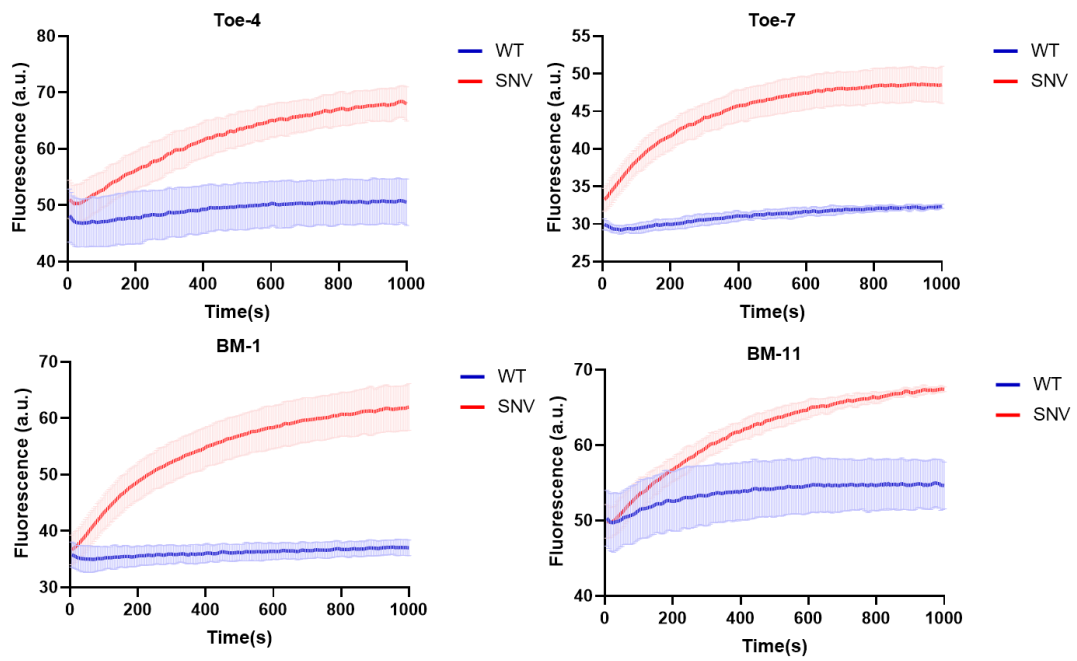

**Figure S9.** SNV detection of STK11-F354L by four kinds of probes.



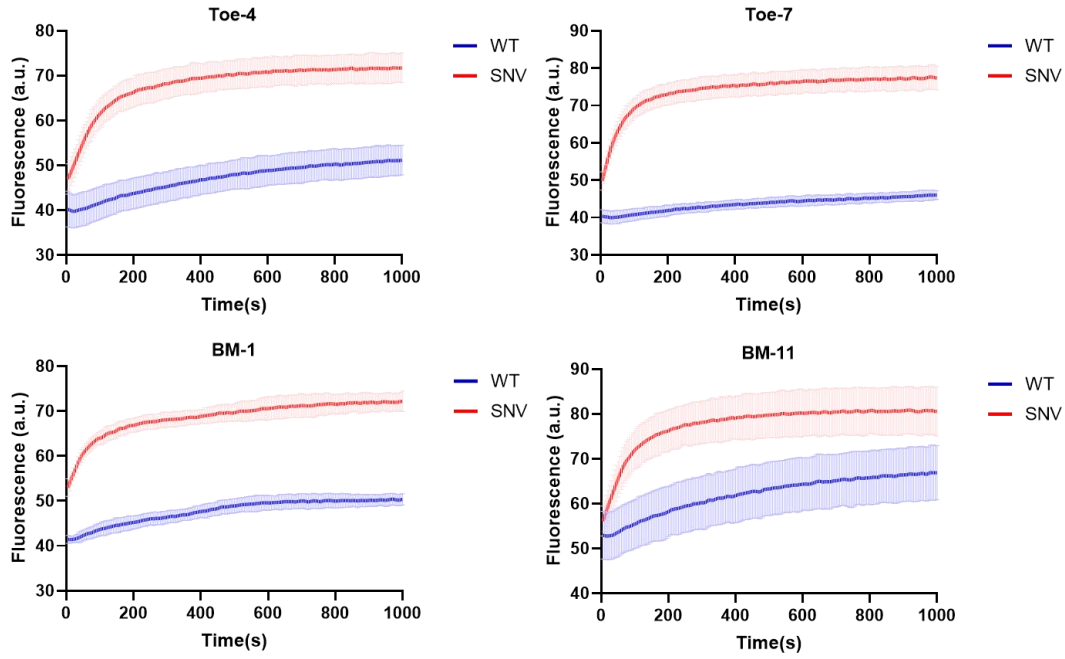

**Figure S10.** SNV detection of TP53-Y220C by four kinds of probes.

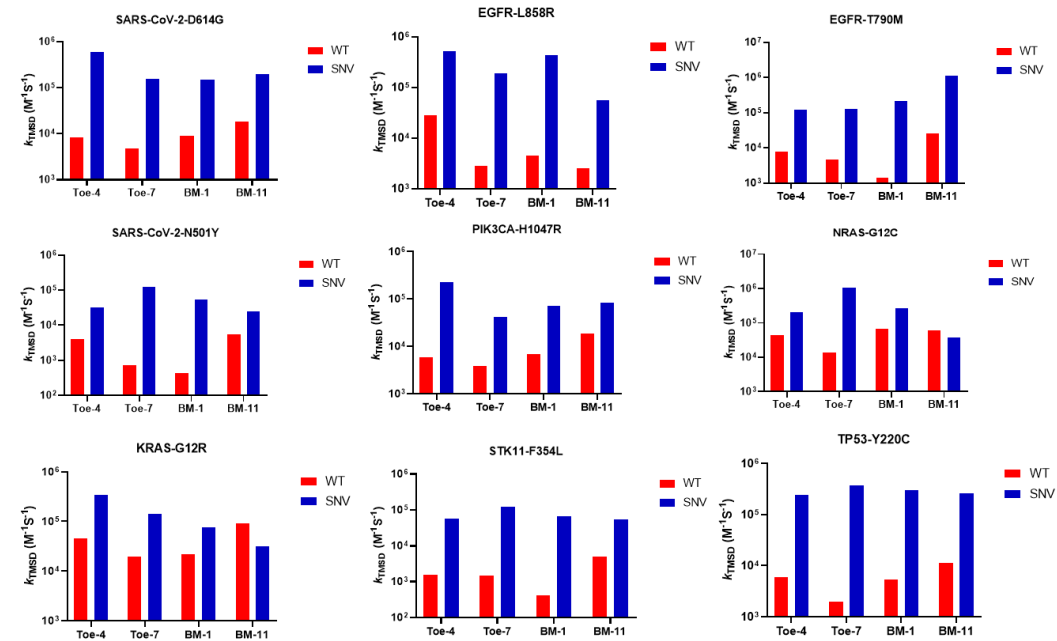

**Figure S11.** TMSD reaction constants. The second order kinetics equation was used to fit the experimental data in Figure S2-S10 to obtain TMSD reaction constants.

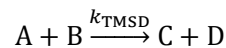

$$d[D]/dt = k \times [A] \times [B]$$

[A] and [B] represent the concentrations of invader and template strand which are both 100 nM, [C] and [D] are the concentrations of quencher and fluorophore labeled strands, respectively. [D] was obtained from the fluorescence curve by the equation  $[D] = (F - F_{\text{initial}}) / (F_{\text{final}} - F_{\text{initial}})$  where F is

the fluorescence at a certain time,  $F_{\text{final}}$  and  $F_{\text{initial}}$  represent the fluorescence intensity of the prepared 'F' structure and 'TWJ' structure (Figure 2A), respectively.

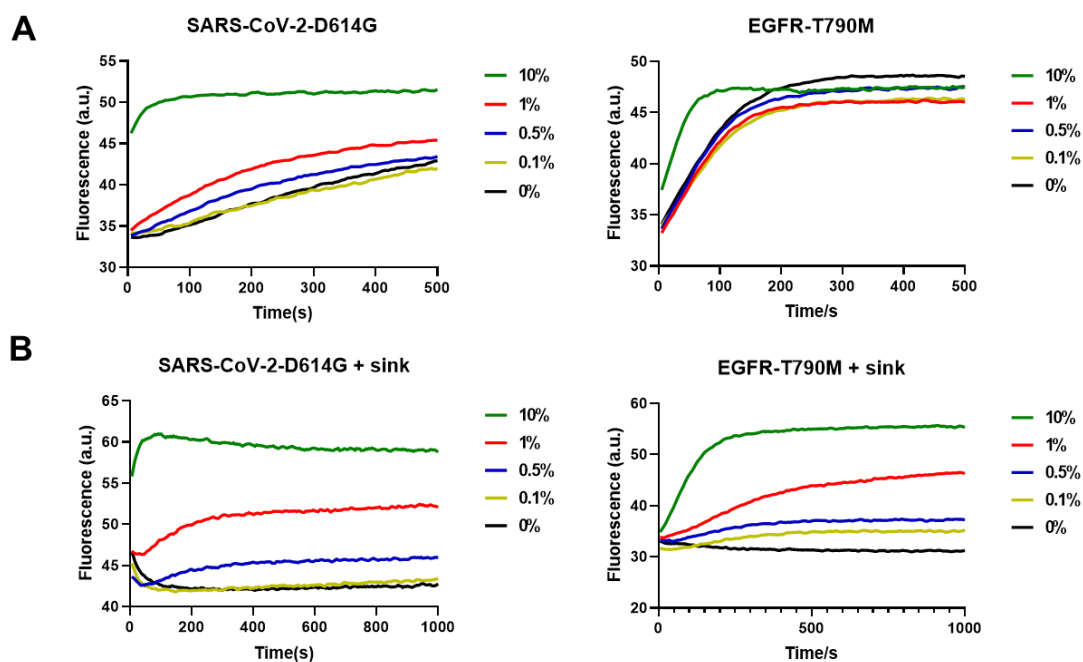

**Figure S12.** Low VAF detection. (A) Fluorescence curves of TMSD probes (Toe7 mismatch) in the presence of different percentages of SNV strands. (B) Fluorescence curves of probe-sink systems (Toe7 mismatch) in the presence of different percentages of SNV strands.

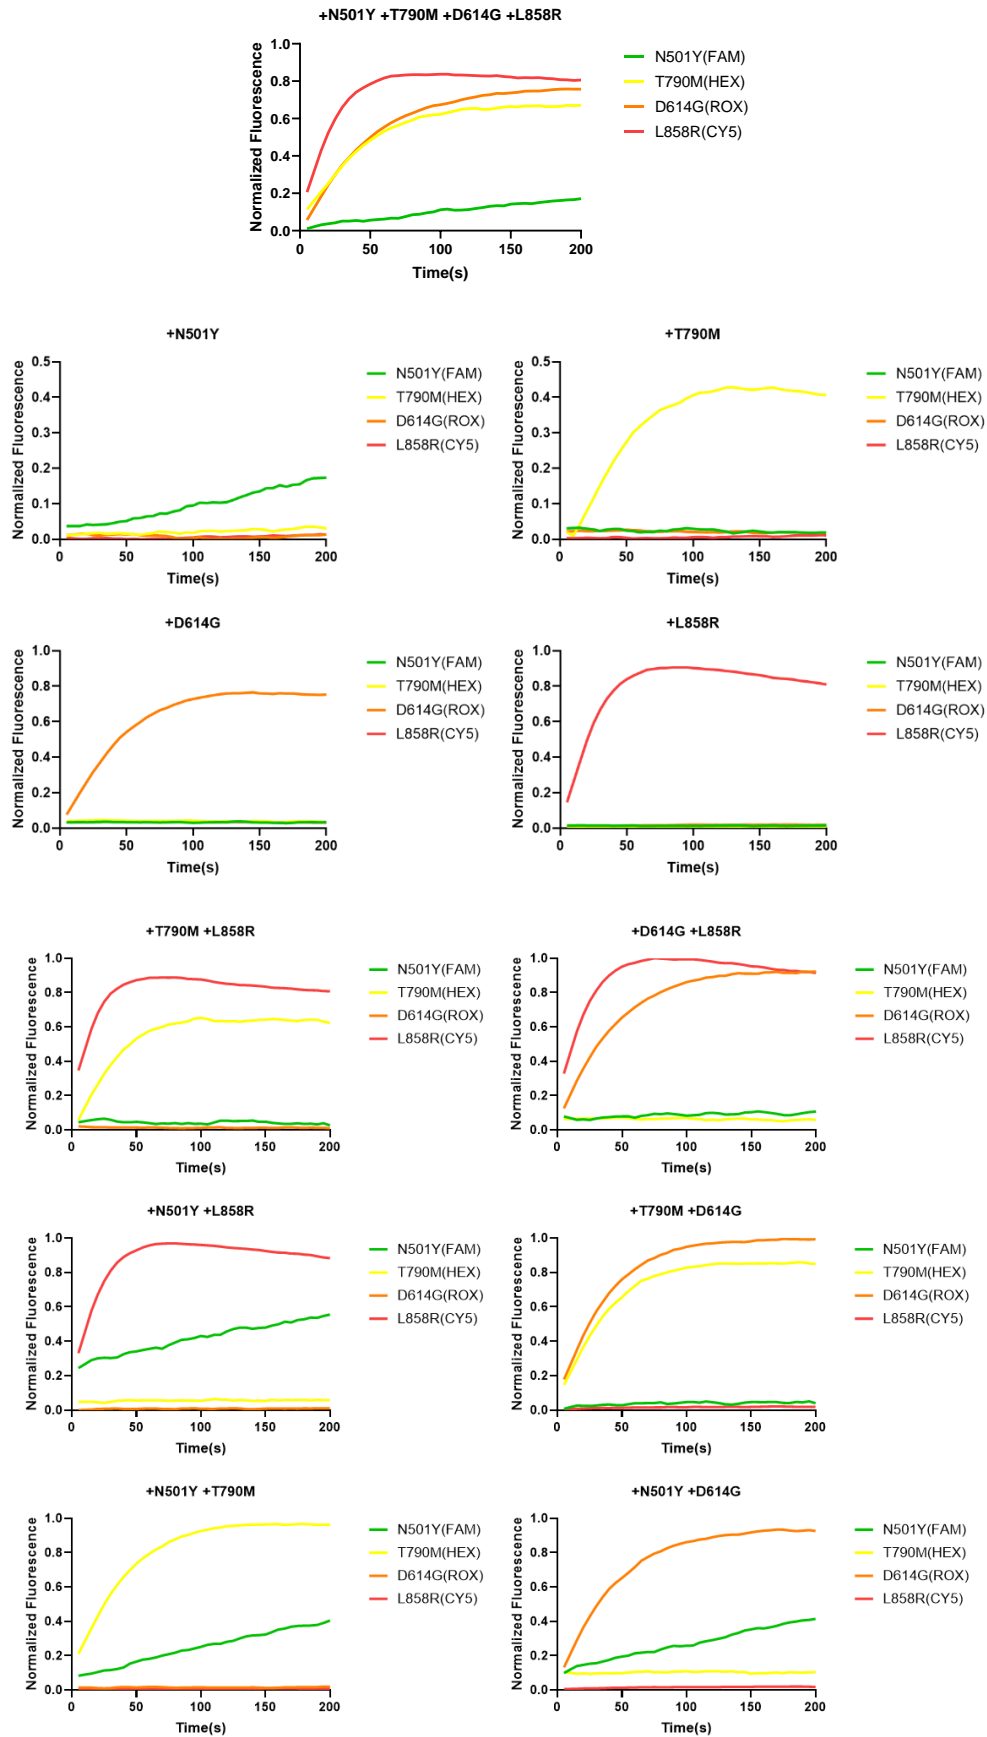

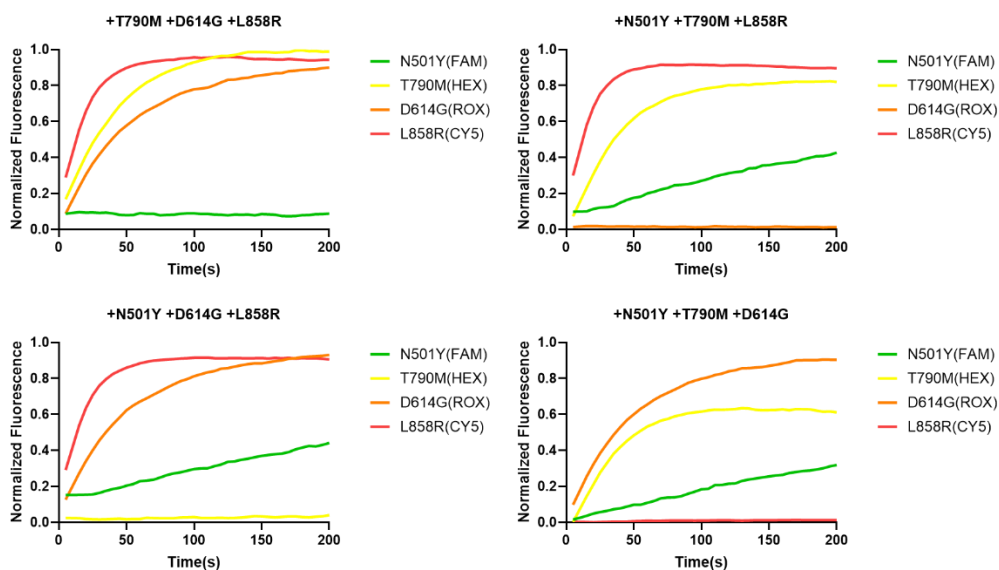

**Figure S13.** Raw fluorescence curves of multiplex detection. Due to the different excitation efficiencies of the dyes, each color was normalized respectively. The fluorescence intensities of the products and reactants of TMSD reaction were normalized as ‘1’ and ‘0’ for each color.

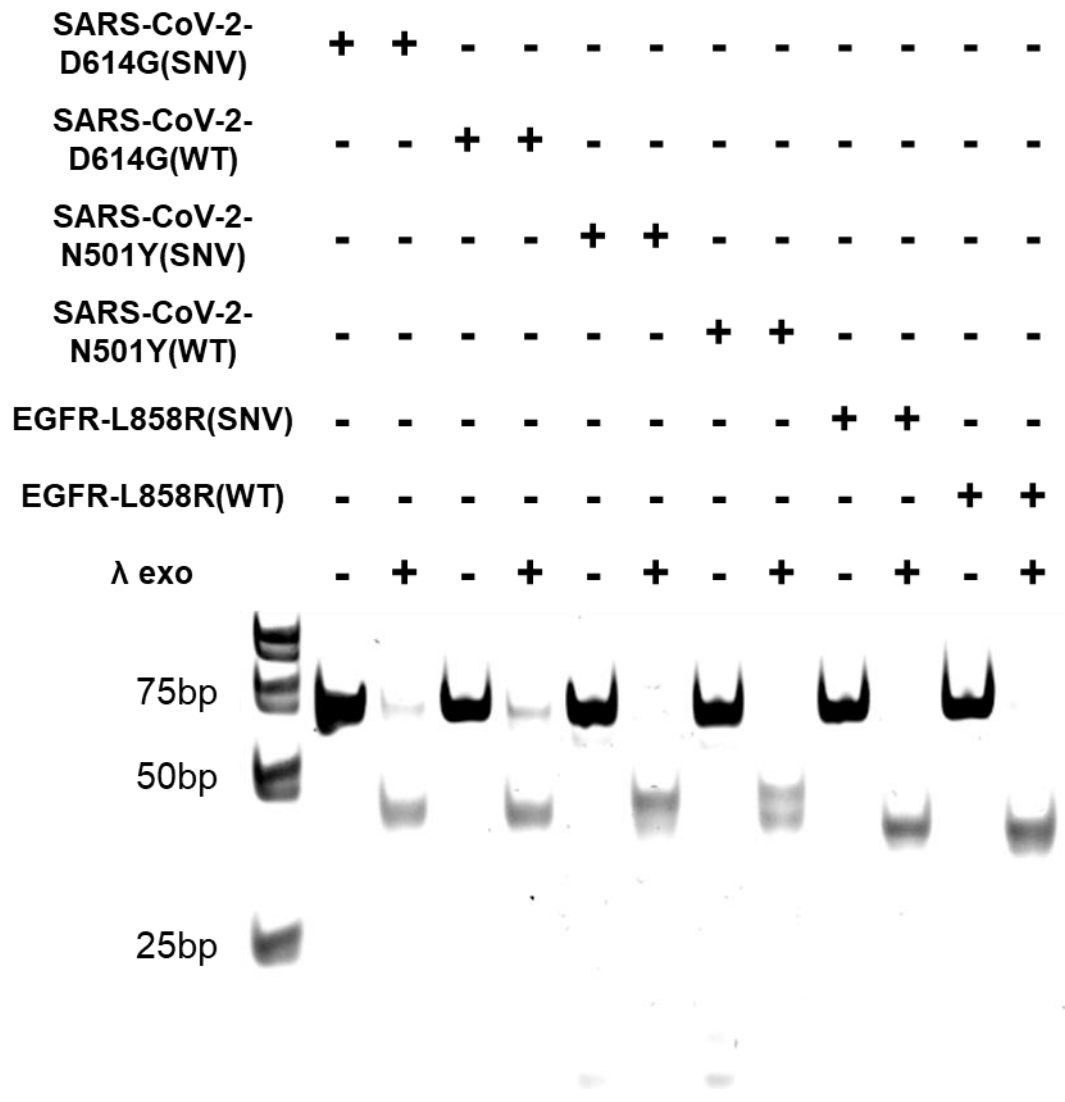

**Figure S14.** Gel electrophoresis of PCR products from plasmids, and single-stranded PCR generation by  $\lambda$  exonuclease.
